# Supplementary material
Source: PubMed Central journal article supplement (PMC3037279)
Supplement: NIHMS270161-supplement-Supp1.pdf [file NIHMS270161-supplement-Supp1.pdf]

## Supplemental Materials.

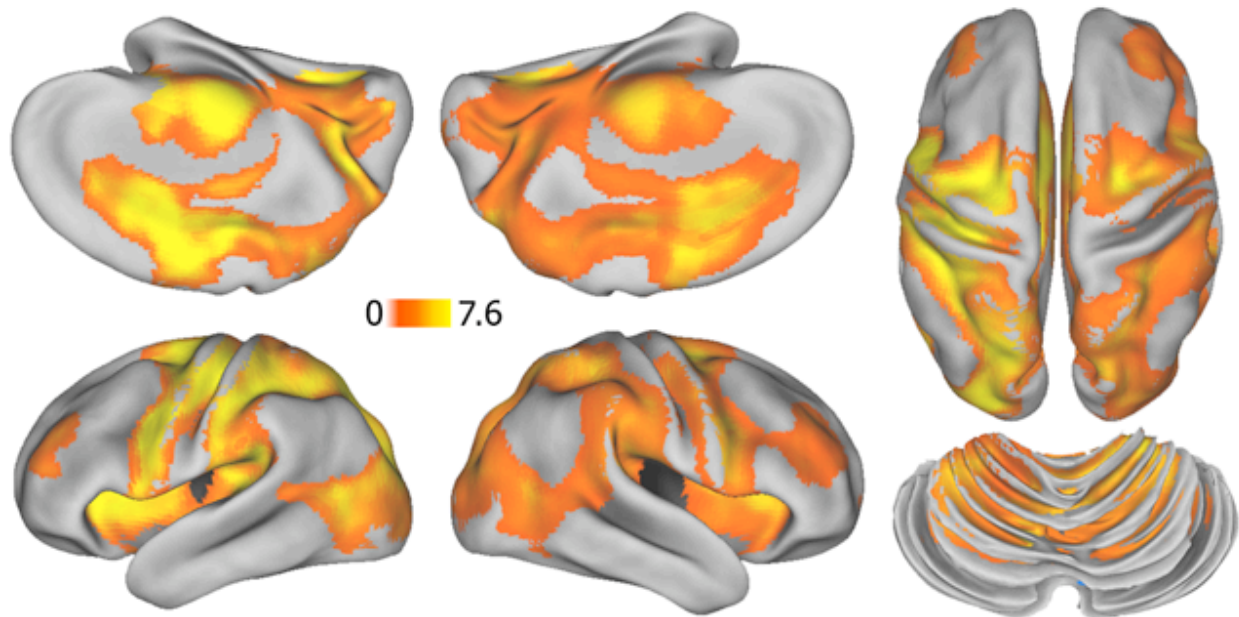

Supplemental Figure 1. Main effect of executing the target capture task, collapsed across type of trial (viscous or target challenge). There is widespread recruitment of premotor, motor and parietal cortex as well as anterior cerebellum. Recruitment is greater in the left motor areas, consistent with the right hand execution. Statistical threshold is  $p < 0.05$  FDR corrected for multiple comparisons. This map was used as an inclusive mask for contrasts shown in supplemental figures 3 and 4.

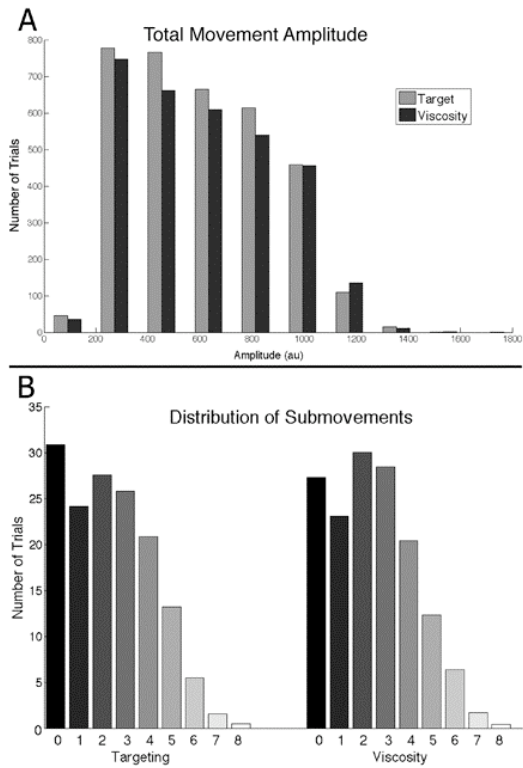

Supplemental Figure 2. Distribution of movement amplitude (A) and number of submovements (B) as a function of function of task type (viscous and target challenge), aggregated over all subjects. The two tasks are closely matched for both these kinematic variables.

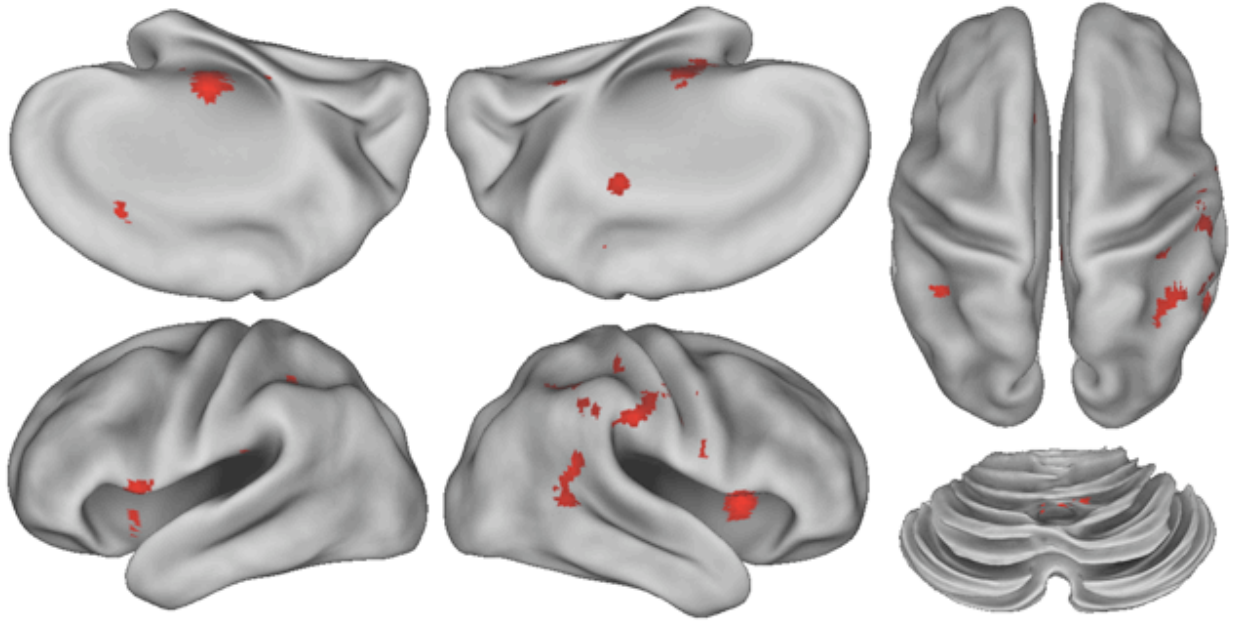

Supplemental Figure 3. Submovement formation in cortex and cerebellum. Areas where the number of submovements during the viscous challenge task correlated with BOLD activity on a trial by trial basis are shown in red. There were no significant areas for the target capture task. Statistical threshold,  $p < 0.005$  uncorrected. Peaks within this volume that are significant with FDR correction for multiple test comparisons are highlighted in supplemental table 1.

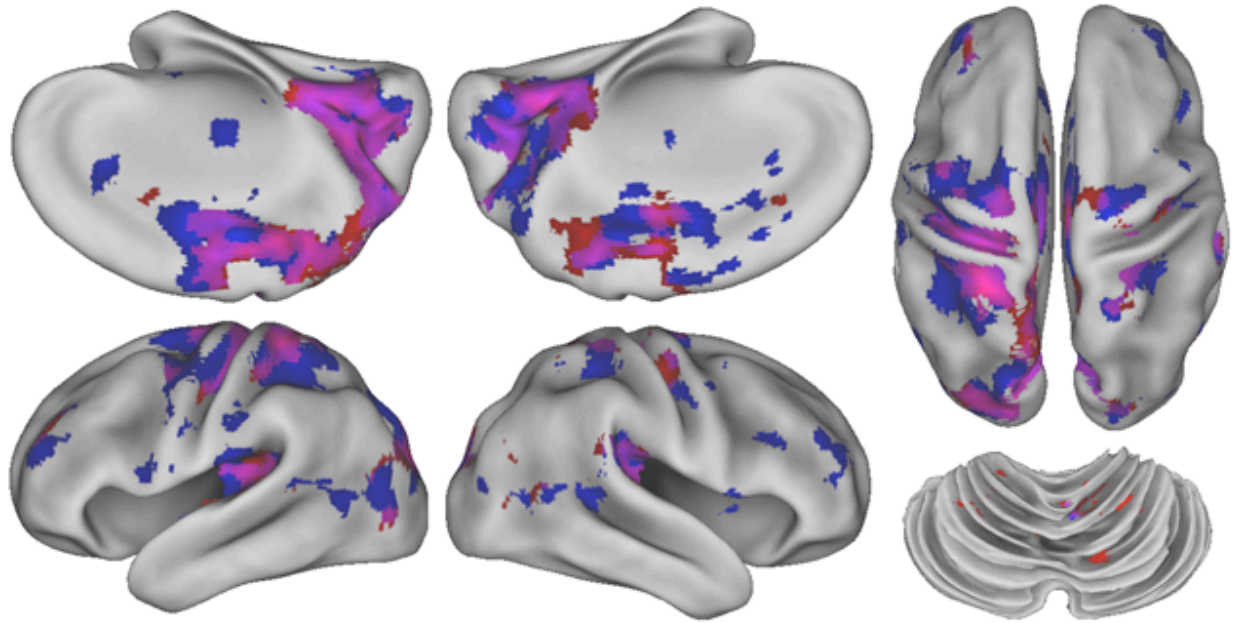

Supplemental Figure 4. Movement amplitude effects in cortex and cerebellum. Areas where the movement amplitude correlated with BOLD activity on a trial by trial basis for the viscous challenge are shown in red, for the target challenge in blue and their overlap in purple. Statistical threshold,  $p < 0.005$  uncorrected. Peaks within this volume that are significant with FDR correction for multiple test comparisons are highlighted in supplemental table 1.

**Supplemental Table 1. Brain Correlates of Submovement Formation**

| Search Vs Contrast                           | Anatomic Region                                    | x       | y   | z   | t    | p     | Significant after FDR Correction |   |
|----------------------------------------------|----------------------------------------------------|---------|-----|-----|------|-------|----------------------------------|---|
| <b>Basal Ganglia</b>                         |                                                    |         |     |     |      |       |                                  |   |
| Submovement (Viscous) > Submovement (Target) | Left Insula                                        | -34     | 6   | -10 | 5.87 | 0.001 | *                                |   |
| Submovement (Viscous) > Submovement (Target) | Left Subthalamic Nucleus                           | -14     | -18 | -6  | 4.39 | 0.001 | *                                |   |
| Submovement (Viscous) > Submovement (Target) | Right Internal Globus Pallidus                     | 20      | -10 | -8  | 4.24 | 0.001 | *                                |   |
| Submovement (Viscous) > Submovement (Target) | Right Putamen/Insula                               | 30      | 14  | 0   | 3.98 | 0.001 | *                                |   |
| Submovement (Viscous) > Submovement (Target) | Right Ventral Lateral Nucleus Thalamus             | 12      | -12 | 2   | 2.85 | 0.005 | *                                |   |
| Submovement (Viscous) > Submovement (Target) | Right Internal Globus Pallidus                     | 16      | -6  | 2   | 2.78 | 0.005 | *                                |   |
| Submovement (Viscous) > Submovement (Target) | Right Putamen/Insula                               | 34      | -6  | -10 | 2.76 | 0.005 | *                                |   |
| Amplitude (Target) > Amplitude (Viscous)     | Left WM                                            | -22     | -16 | 16  | 4.69 | 0.001 |                                  |   |
| Amplitude (Target) > Amplitude (Viscous)     | Left Medial Dorsal Nucleus Thalamus                | -6      | -14 | 12  | 3.13 | 0.005 |                                  |   |
| Amplitude (Target) > Amplitude (Viscous)     | Right Medial Dorsal Nucleus Thalamus               | 6       | -12 | 14  | 3.17 | 0.005 |                                  |   |
| Amplitude (Target) > Amplitude (Viscous)     | Right Caudate                                      | 14      | 18  | 2   | 3.16 | 0.005 |                                  |   |
| Amplitude (Target) > Amplitude (Viscous)     | Left Caudate                                       | -20     | 24  | -4  | 3    | 0.005 |                                  |   |
| Submovement (Viscous)                        | Left Substantia Nigra                              | -16     | -24 | -10 | 5.02 | 0.001 | *                                |   |
| Submovement (Viscous)                        | Right Internal Segment Globus Pallidus             | 22      | -8  | -2  | 4.94 | 0.001 | *                                |   |
| Submovement (Viscous)                        | Right Caudate/Putamen                              | 20      | -10 | 16  | 4.58 | 0.001 | *                                |   |
| Submovement (Viscous)                        | Left Caudate                                       | -22     | -4  | 26  | 3.29 | 0.005 | *                                |   |
| Submovement (Viscous)                        | Left Insula                                        | -30     | 4   | 20  | 3.29 | 0.005 | *                                |   |
| Submovement (Viscous)                        | Right WM                                           | 26      | -28 | 16  | 3.29 | 0.005 | *                                |   |
| Submovement (Viscous)                        | Left Insula                                        | -34     | -12 | 14  | 3.09 | 0.005 | *                                |   |
| Submovement (Viscous)                        | Right Caudate/Putamen                              | 14      | 18  | -6  | 3    | 0.005 | *                                |   |
| Submovement (Viscous)                        | Left Internal Segment Globus Pallidus/Hypothalamus | -6      | -2  | -10 | 3    | 0.005 | *                                |   |
| Submovement (Viscous)                        | Left WM                                            | 2       | 14  | 18  | 3    | 0.005 | *                                |   |
| Submovement (Viscous)                        | Left WM                                            | -28     | -28 | 2   | 3    | 0.005 | *                                |   |
| Submovement (Viscous)                        | Left Internal Segment Globus Pallidus/Hypothalamus | -2      | -2  | -12 | 3    | 0.005 | *                                |   |
| Submovement (Viscous)                        | Left Insula                                        | -34     | 8   | -10 | 4.64 | 0.001 | *                                |   |
| Amplitude (Viscous)                          | Right Putamen                                      | 30      | -14 | 4   | 5.43 | 0.001 | *                                |   |
| Amplitude (Viscous)                          | Right Caudate/Putamen                              | 16      | 4   | 8   | 4.75 | 0.001 | *                                |   |
| Amplitude (Viscous)                          | Left Insula/Putamen                                | -38     | -16 | 2   | 4.22 | 0.001 | *                                |   |
| Amplitude (Viscous)                          | Left Putamen                                       | -26     | -10 | 6   | 3.26 | 0.005 |                                  |   |
| Amplitude (Target)                           | Left Caudate                                       | -22     | -14 | 16  | 4.69 | 0.001 | *                                |   |
| Amplitude (Target)                           | Right Putamen/Insula                               | 34      | -20 | 0   | 4.62 | 0.001 | *                                |   |
| Amplitude (Target)                           | Left Putamen/Insula                                | -36     | -8  | 2   | 4.34 | 0.001 | *                                |   |
| Amplitude (Target)                           | Left Internal Segment Globus Pallidus              | -18     | 0   | -14 | 3.42 | 0.005 | *                                |   |
| <b>Cortex</b>                                |                                                    |         |     |     |      |       |                                  |   |
| Amplitude (Viscous)                          | Left Superior Parietal Lobule                      | BA 7    | -26 | -42 | 66   | 8.43  | 0.001                            | * |
| Amplitude (Viscous)                          | Left Superior Temporal Gyrus                       | BA 41   | -44 | -38 | 16   | 5.86  | 0.001                            | * |
| Amplitude (Viscous)                          | Left Middle Frontal Gyrus                          | BA 10   | -32 | 50  | 10   | 4.5   | 0.001                            | * |
| Amplitude (Viscous)                          | Right Middle Frontal Gyrus                         | BA 10   | 30  | 52  | 10   | 4.36  | 0.001                            | * |
| Amplitude (Viscous)                          | Right Middle Temporal Gyrus                        | BA 39   | 52  | -68 | 16   | 4.25  | 0.001                            | * |
| Amplitude (Viscous)                          | Right Cingulate Gyrus                              | BA 32   | 12  | 28  | 30   | 3.83  | 0.001                            | * |
| Amplitude (Viscous)                          | Left Posterior IPS                                 | BA 19   | -32 | -68 | 38   | 3.71  | 0.005                            | * |
| Amplitude (Viscous)                          | Left Cingulate Gyrus                               | BA 24   | -4  | 14  | 36   | 3.24  | 0.005                            | * |
| Amplitude (Target)                           | Left Cingulate Sulcus (CMA)                        | BA 24   | -6  | -22 | 46   | 7.3   | 0.001                            | * |
| Amplitude (Target)                           | Left Middle Frontal Gyrus                          | BA 10   | -36 | 52  | 18   | 5.07  | 0.001                            | * |
| Amplitude (Target)                           | Right Inferior Frontal Sulcus                      | BA 9    | 42  | 22  | 22   | 4.85  | 0.001                            | * |
| Amplitude (Target)                           | Left Anterior Cingulate Gyrus                      | BA 24   | -4  | 30  | 18   | 4.27  | 0.001                            | * |
| Amplitude (Target)                           | Left Middle Frontal Gyrus                          | BA 9    | -32 | 34  | 34   | 4.15  | 0.001                            | * |
| Amplitude (Target)                           | Right Middle Frontal Gyrus                         | BA 10   | 36  | 48  | 14   | 4.03  | 0.001                            | * |
| Amplitude (Target)                           | Right Medial Segment, Superior Frontal Gyrus       | BA 6    | 8   | 24  | 46   | 3.8   | 0.001                            | * |
| Amplitude (Target)                           | Right Superior Frontal Gyrus                       | BA 6    | 42  | 6   | 56   | 3.61  | 0.005                            | * |
| Amplitude (Target)                           | Right Superior Frontal Gyrus                       | BA 8    | 24  | 38  | 32   | 3.46  | 0.005                            | * |
| Amplitude (Target)                           | Left Inferior Parietal Lobule                      | BA 40   | -60 | -24 | 36   | 3.36  | 0.005                            | * |
| Amplitude (Target)                           | Right Inferior Precentral Gyrus (PMv)              | BA 6    | 50  | -2  | 28   | 3.2   | 0.005                            | * |
| Amplitude (Target)                           | Right Cingulate Gyrus                              | BA 32   | 8   | 32  | 38   | 3.11  | 0.005                            | * |
| Amplitude (Target)                           | Left Middle Frontal Gyrus                          | BA 9    | -30 | 26  | 24   | 3.08  | 0.005                            | * |
| Submovement (Viscous)                        | Right Superior Parietal Lobule                     | BA 5    | 22  | -38 | 54   | 4.27  | 0.001                            | * |
| Submovement (Viscous)                        | Left Cingulate Gyrus                               | BA 31   | -8  | -34 | 34   | 4.14  | 0.001                            | * |
| Submovement (Viscous)                        | Left Parieto-Occipital Fissure                     | BA 30   | -6  | -60 | 14   | 4     | 0.001                            | * |
| Submovement (Viscous)                        | Right Inferior Parietal Lobule                     | BA 40   | 62  | -26 | 36   | 3.94  | 0.001                            | * |
| Submovement (Viscous)                        | Right Middle Temporal Gyrus                        | BA 39   | 44  | -50 | 6    | 3.9   | 0.001                            | * |
| Submovement (Viscous)                        | Left Cingulate Gyrus                               | BA 32   | -14 | 22  | 34   | 3.84  | 0.001                            | * |
| Submovement (Viscous)                        | Left Postcentral Sulcus                            | BA 7    | -22 | -30 | 42   | 3.81  | 0.001                            | * |
| Submovement (Viscous)                        | Right Inferior Parietal Lobule                     | BA 7    | 30  | -62 | 32   | <3.72 | 0.005                            |   |
| Submovement (Viscous)                        | Right Cingulate Gyrus                              | BA 23   | 6   | -32 | 32   | <3.72 | 0.005                            |   |
| Submovement (Viscous)                        | Right Anterior Cingulate Gyrus                     | BA 24   | 16  | 12  | 28   | <3.72 | 0.005                            |   |
| Submovement (Viscous)                        | Left Parahippocampal Gyrus                         | BA 35   | -18 | -32 | -10  | <3.72 | 0.005                            |   |
| Submovement (Viscous)                        | Left Superior Temporal Gyrus                       | BA 42   | -56 | -30 | 18   | <3.72 | 0.005                            |   |
| Submovement (Viscous)                        | Right Precentral Gyrus (PMv)                       | BA 6    | 46  | -14 | 32   | <3.72 | 0.005                            |   |
| Submovement (Viscous)                        | Left Inferior Parietal Lobule                      | BA 40   | -50 | -44 | 42   | <3.72 | 0.005                            |   |
| Submovement (Viscous)                        | Left Inferior Parietal Lobule                      |         | -34 | -36 | 32   | <3.72 | 0.005                            |   |
| Submovement (Viscous)                        | Right Inferior Precentral Gyrus (PMv)              | BA 6    | 62  | 2   | 18   | <3.72 | 0.005                            |   |
| Submovement (Viscous)                        | Left Intraparietal Sulcus                          | BA 40   | -40 | -46 | 48   | <3.72 | 0.005                            |   |
| Submovement (Viscous)                        | Right Superior Temporal Sulcus                     | BA 41   | 44  | -32 | 2    | <3.72 | 0.005                            |   |
| Submovement (Viscous)                        | Left Middle Frontal Gyrus                          | BA 9    | -36 | 28  | 28   | <3.72 | 0.005                            |   |
| Submovement (Target)                         | Right Cingulate Gyrus                              | BA 23   | 10  | -20 | 30   | 3.61  | 0.005                            | * |
| Submovement (Target)                         | Right Cingulate Gyrus                              | BA 31   | 18  | -24 | 40   | 3.55  | 0.005                            | * |
| <b>Cerebellum</b>                            |                                                    |         |     |     |      |       |                                  |   |
| Submovement (Viscous) > Submovement (Target) | Right Anterior Lobe Cerebellum                     | Lob III | 0   | -44 | -26  | 4.17  | 0.001                            | * |
| Submovement (Viscous) > Submovement (Target) | Right Anterior Lobe Cerebellum                     | Lob V   | 6   | -60 | -16  | 4.04  | 0.001                            | * |
| Submovement (Viscous) > Submovement (Target) | Left Anterior Lobe Cerebellum                      | Lob V   | -6  | -62 | -22  | 3.97  | 0.005                            | * |
| Submovement (Viscous) > Submovement (Target) | Left Anterior Lobe Cerebellum                      | Lob VI  | -28 | -64 | -28  | 3.88  | 0.005                            | * |
| Amplitude (Viscous) > Amplitude (Target)     | Left Anterior Lobe Cerebellum                      | Lob V   | -18 | -44 | -20  | 4.19  | 0.001                            | * |
| Amplitude (Viscous) > Amplitude (Target)     | Right Anterior Lobe Cerebellum                     | Lob V   | 0   | -62 | -16  | 4.15  | 0.001                            | * |
| Submovement (Viscous)                        | Left Anterior Lobe Cerebellum                      | Lob V   | -4  | -60 | -24  | 3.87  | 0.005                            | * |
| Submovement (Viscous)                        | Right Anterior Lobe Cerebellum                     | Lob V   | 8   | -62 | -18  | 3.51  | 0.005                            | * |
| Submovement (Viscous)                        | Right Anterior Lobe Cerebellum                     | Lob III | 6   | -34 | -28  | 3.4   | 0.005                            | * |
| Amplitude (Viscous)                          | Left Anterior Lobe Cerebellum                      | Lob V   | -2  | -62 | -16  | 5.06  | 0.001                            | * |
| Amplitude (Viscous)                          | Left Anterior Lobe Cerebellum                      | Lob V   | -18 | -44 | -20  | 4.3   | 0.001                            | * |
| Amplitude (Viscous)                          | Right Anterior Lobe Cerebellum                     | Lob VI  | 22  | -56 | -30  | 4.34  | 0.001                            | * |
| Amplitude (Viscous)                          | Left Anterior Lobe Cerebellum                      | Lob VI  | -24 | -56 | -22  | 3.76  | 0.005                            | * |
| Amplitude (Viscous)                          | Right Posterior Lobe Cerebellum                    | Lob VI  | 14  | -70 | -22  | 3.75  | 0.005                            | * |
| Amplitude (Viscous)                          | Left Anterior Lobe Cerebellum                      | Lob VI  | -30 | -54 | -32  | 3.41  | 0.005                            | * |
| Amplitude (Target)                           | Right Anterior Lobe Cerebellum                     | Lob V   | 8   | -58 | -12  | 3.56  | 0.005                            | * |

BA - Brodmann's area (based on Talairach atlas)  
Lob - Lobule (based on atlas of Diedrichsen)
